# Supplementary material for: Honeycomb in honeycomb carbon bubbles: excellent Li- and Na-storage performances
Source: Royal Society of Chemistry journal article supplement (doi:10.1039/c5ta04561d), 2015-01-01
Supplement: c5ta04561d1.pdf [file c5ta04561d1.pdf]

## Supporting Information for

### **Honeycomb in honeycomb carbon bubbles: excellent Li- and Na-storage performances**

Gongzheng Yang<sup>1#</sup>, Huawei Song<sup>1#</sup>, Hao Cui<sup>1, 2</sup> and Chengxin Wang<sup>1, 2\*</sup>

*<sup>1</sup>State key laboratory of optoelectronic materials and technologies, School of Physics Science and Engineering, Sun Yat-sen (Zhongshan) University, Guangzhou 510275, People's Republic of China*

*<sup>2</sup>The Key Laboratory of Low-carbon Chemistry & Energy Conservation of Guangdong Province, Sun Yat-sen (Zhongshan) University, Guangzhou 510275, People's Republic of China*

<sup>#</sup> These authors contributed equally to this work.

\* Correspondence and requests for materials should be addressed to C. X. Wang. Tel & Fax: +86-20-84113901, E-mail: wchengx@mail.sysu.edu.cn

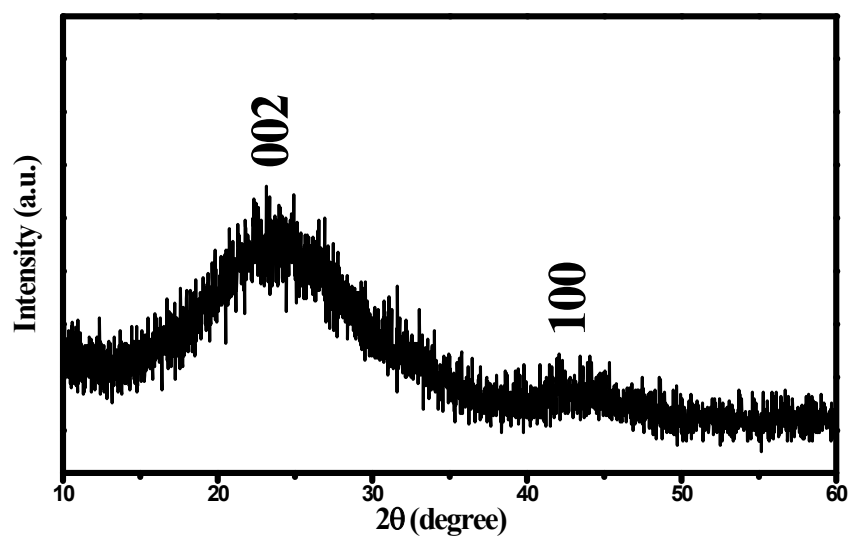

**Figure S1. XRD patterns of the HHCBs.**

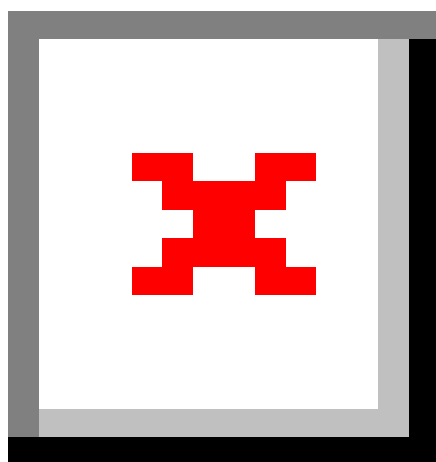

**Figure S2. SEM images of the Zn microspheres.**

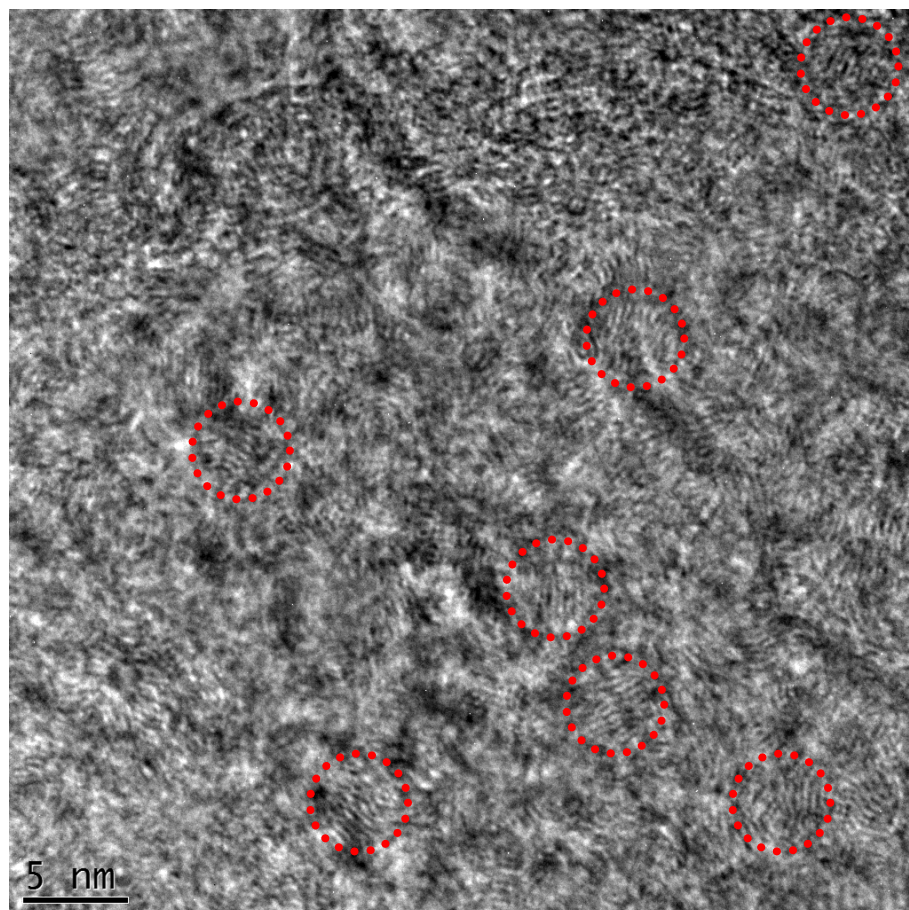

**Figure S3. A representative TEM image shows the localized graphitization that probed distributing almost anywhere on the shells of hollow carbon bubbles.**

**Table S1. BET surface area ( $S_{\text{BET}}$ ), total ( $V_{\text{total}}$ ), micropore ( $V_{\text{micro}}$ ) and mesopore ( $V_{\text{meso}}$ ) pore volumes of the HHCBS.**

| <b>Sample</b> | <b><math>S_{\text{BET}}^{\text{a}}</math><br/>(<math>\text{m}^2/\text{g}</math>)</b> | <b><math>V_{\text{total}}^{\text{b}}</math><br/>(<math>\text{cm}^3/\text{g}</math>)</b> | <b><math>V_{\text{micro}}^{\text{c}}</math><br/>(<math>\text{cm}^3/\text{g}</math>)</b> | <b><math>V_{\text{meso}}^{\text{d}}</math><br/>(<math>\text{cm}^3/\text{g}</math>)</b> | <b><math>D_{\text{BJH}}^{\text{e}}</math><br/>(nm)</b> |
|---------------|--------------------------------------------------------------------------------------|-----------------------------------------------------------------------------------------|-----------------------------------------------------------------------------------------|----------------------------------------------------------------------------------------|--------------------------------------------------------|
| HHCBS         | 780                                                                                  | 1.53                                                                                    | 0.32                                                                                    | 1.08                                                                                   | 8.7                                                    |

**$^{\text{a}}S_{\text{BET}}$ : surface area calculated by the BET method.**

**$^{\text{b}}V_{\text{total}}$ : total pore volume of pores.**

**$^{\text{c}}V_{\text{micro}}$ : pore volume of micropores calculated by the HK method.**

**$^{\text{d}}V_{\text{meso}}$ : pore volume of mesopores calculated by the BJH method.**

**$^{\text{e}}D_{\text{BJH}}$ : mesopore diameter calculated from adsorption branch of nitrogen isotherms using BJH method.**

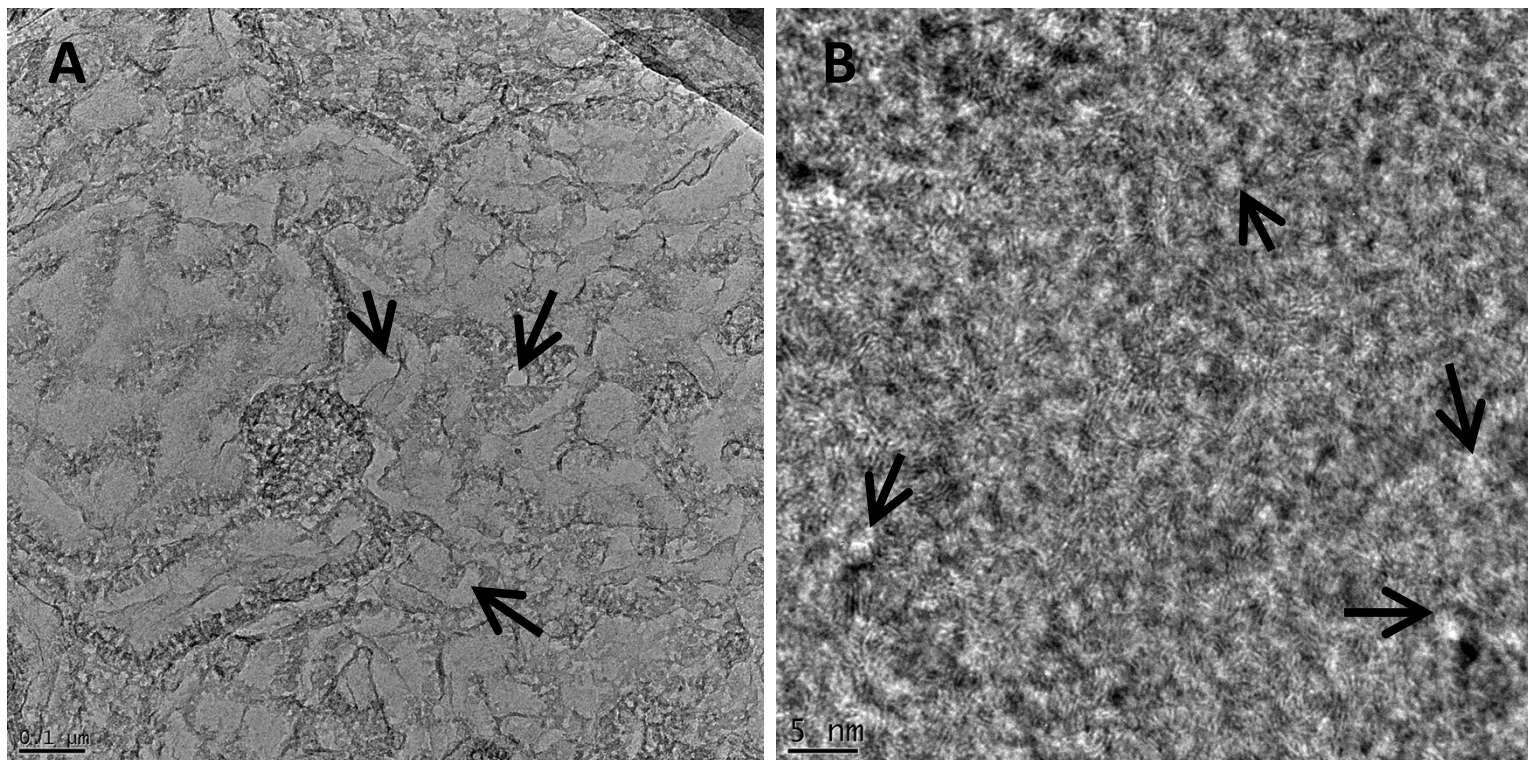

**Figure S4. Low-magnification (A) and high resolution (B) TEM images of a broken hollow carbon bubble, in which one can clearly see the gaps, meso-, and micropores.**
